# Supplementary material for: The role of conserved arginine in the GH70 family: a computational study of the structural features and their implications on the catalytic mechanism of GTF-SI fromStreptoccocus mutans
Source: Royal Society of Chemistry journal article supplement (doi:10.1039/c9ob01055f), 2019-01-01
Supplement: c9ob01055f2.pdf [file c9ob01055f2.pdf]

# Role of conserved Arginine in GH70 family: A Computational study on the Structural Features and its Implications on the Catalytic Mechanism of GTF-SI from *Streptococcus mutans*

Leslie Sanchez<sup>a</sup>, Fernanda Mendoza,<sup>b</sup> Joel B. Alderete,<sup>c</sup> Verónica A. Jiménez,<sup>b</sup> Gonzalo A. Jaña,<sup>b</sup>

<sup>a</sup> Doctorado en Fisicoquímica Molecular, Universidad Andres Bello, Republica 275, Santiago, Chile.

<sup>b</sup> Departamento de Ciencias Químicas, Facultad de Ciencias Exactas, Universidad Andres Bello, Sede Concepción, Autopista Concepción-Talcahuano 7100, Talcahuano, Chile.

<sup>c</sup> Instituto de Química de Recursos Naturales, Universidad de Talca, Avenida Lircay s/n, Casilla 747, Talca, Chile.

**KEYWORDS:** GH70, *GTF-SI*, *glucansucrase*, *glucans*, *QM/MM*, *mechanism*, *enzymatic catalysis*.

Corresponding author: [gonzalo.jana@unab.cl](mailto:gonzalo.jana@unab.cl)

## Supporting Information

1. Root Means Square Displacements (RMSD) from MD simulations.....p.1
2. Average number of water molecules within the active site.....p.2
3. QM/MM scan along the reaction coordinate defined as  $RC = d(C1 - O_G) - d(C1 - OD1) - d(HE2 - O_G)$ .....p.2
4. Minimum energy path (MEP) for the formation of CGE.....p.3

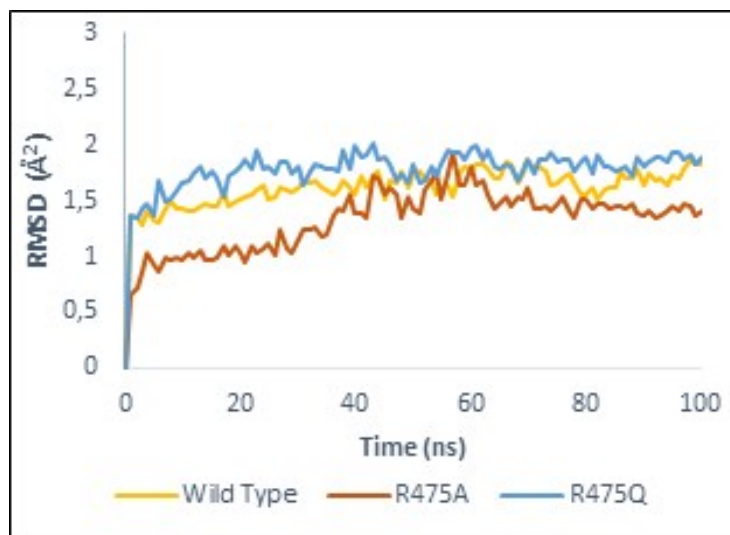

**Figure S1.** Root Means Square Displacements (RMSD) of the MD simulations carried out.

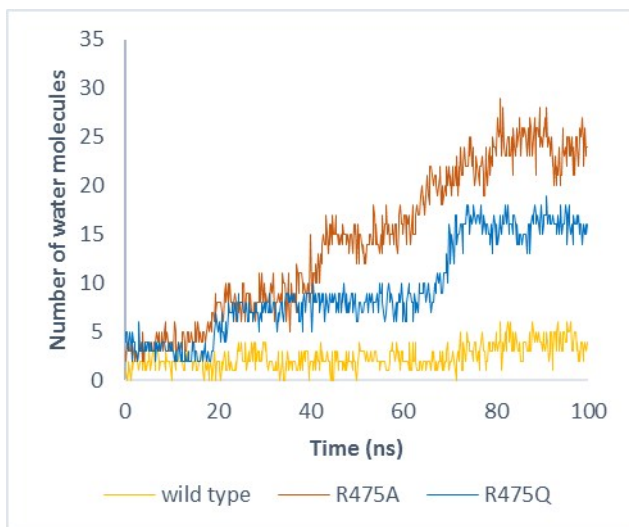

**Figure S2.** Average of water molecules in the active site along of MD simulations

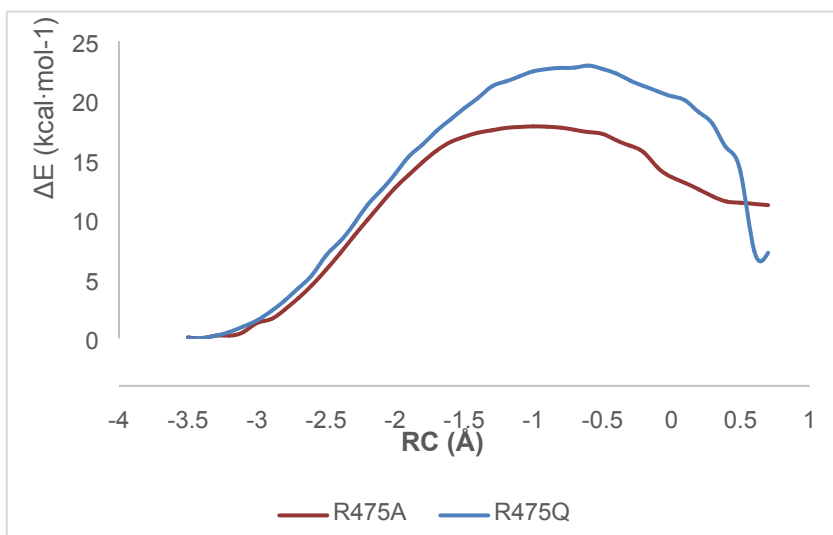

**Figure S3.** QM/MM scan along the reaction coordinate defined as  $RC = d(C1 - O_G) - d(C1 - OD1) - d(HE2 - O_G)$ .

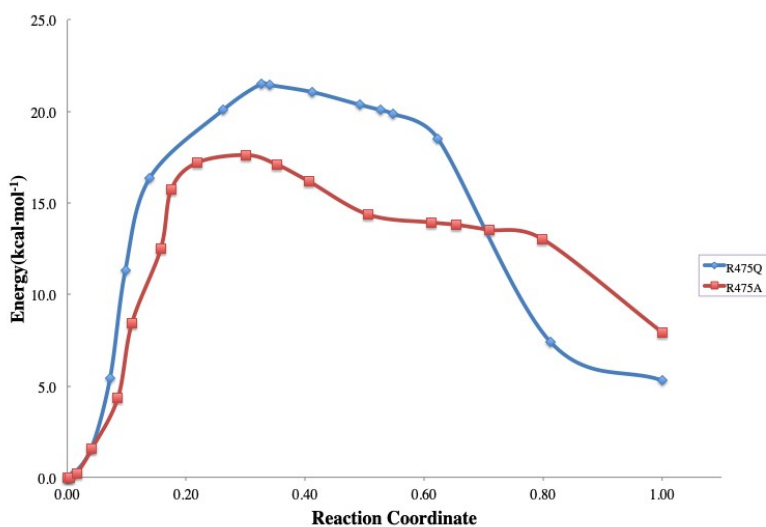

**Figure S4.** Minimum energy path (MEP) for the formation of CGE. The energy values are relative to the energy of the reactant and were obtained at BP86/6-31G(d) level of theory. The reaction coordinate is based on the structural difference between points along the CPR trajectory and the reactant structure. It was normalized between 0 for the reactant and 1 for the product.
